# Mechanism of Werner DNA Helicase: POT1 and RPA Stimulates WRN to Unwind beyond Gaps in the Translocating Strand

Byungchan Ahn<sup>1</sup>\*, Jae Wan Lee<sup>2</sup>\*, Hana Jung<sup>1</sup>, Gad Beck<sup>1</sup>, Vilhelm A. Bohr<sup>2\*</sup>

**1** Department of Life Sciences, University of Ulsan, Ulsan, Korea, **2** Laboratory of Molecular Gerontology, Biomedical Research Center, National Institute on Aging, National Institutes of Health, Baltimore, Maryland, United States of America

## Abstract

WRN belongs to the RecQ family of DNA helicases and it plays a role in recombination, replication, telomere maintenance and long-patch base excision repair. Here, we demonstrate that WRN efficiently unwinds DNA substrates containing a 1-nucleotide gap in the translocating DNA strand, but when the gap size is increased to 3-nucleotides unwinding activity significantly declines. In contrast, *E. coli* UvrD (3'→5' helicase), which recognizes nicks in DNA to initiate unwinding, does not unwind past a 1-nucleotide gap. This unique ability of WRN to bypass gaps supports its involvement in DNA replication and LP-BER where such gaps can be produced by glycosylases and the apurinic/aprimidinic endonuclease 1 (APE1). Furthermore, we tested telomere repeat binding factor 2 (TRF2), both variants 1 and 2 of protector of telomeres 1 (POT1v1 and POT1v2) and RPA on telomeric DNA substrates containing much bigger gaps than 3-nucleotides in order to determine whether unwinding could be facilitated through WRN-protein interaction. Interestingly, POT1v1 and RPA are capable of stimulating WRN helicase on gapped DNA and 5'-overhang substrates, respectively.

**Citation:** Ahn B, Lee JW, Jung H, Beck G, Bohr VA (2009) Mechanism of Werner DNA Helicase: POT1 and RPA Stimulates WRN to Unwind beyond Gaps in the Translocating Strand. PLoS ONE 4(3): e4673. doi:10.1371/journal.pone.0004673

**Editor:** Alfred Lewin, University of Florida, United States of America

**Received:** September 30, 2008; **Accepted:** January 28, 2009; **Published:** March 5, 2009

This is an open-access article distributed under the terms of the Creative Commons Public Domain declaration which stipulates that, once placed in the public domain, this work may be freely reproduced, distributed, transmitted, modified, built upon, or otherwise used by anyone for any lawful purpose.

**Funding:** This research was supported by the Intramural Research Program of the National Institute of Health, National Institute on Aging (to V.A.B.). This work was supported by the Brain Korea 21 Project in 2008 from KRF, a Korea Research Foundation Grant of the Korean Government (MOEHRD) (KRF-2008-521-C00211), and the Basic Research Promotion Fund (KRF-2008-412-J00303) (to B.A.). The funders had no role in study design, data collection and analysis, decision to publish, or preparation of the manuscript.

**Competing Interests:** The authors have declared that no competing interests exist.

\* E-mail: bohrv@grc.nia.nih.gov

† These authors contributed equally to this work.

## Introduction

Human RecQ helicases maintain genomic integrity through their involvement in diverse aspects of DNA metabolism including DNA replication, DNA repair, recombination, and telomere maintenance. The genomic instabilities associated with cells deficient in *RECQ2*, *RECQ3*, and *RECQ4* genes are linked to the rare genetic disorders, Bloom syndrome, Werner syndrome (WS), and Rothmund-Thompson syndrome, respectively. WS causes an early onset of aging in patients following puberty with physical features that are strikingly similar to normal aging. WS patients exhibit graying and loss of hair, bilateral cataracts, atherosclerosis, diabetes mellitus type II, osteoporosis, hypogonadism, and a propensity to develop sarcomas [1]. In addition, WS cells exhibit genomic instability [2], replication defects [3], aberrant telomere maintenance [4], and a gene expression profile that resembles normal human aging [5], implicating the role of Werner syndrome protein (WRN) in maintenance of self-renewing capabilities and prevention of cellular senescence. In most cases of WS, frameshift mutations resulting in truncated WRN proteins are the leading cause [6–8].

Cells from WS patients grow slowly and senesce prematurely in culture. This can be reversed by expression of the catalytic telomerase subunit of human telomerase reverse transcriptase (hTERT), demonstrating a critical role of WRN in the process of

cellular senescence by maintaining the integrity of telomeres [9]. Furthermore, primary fibroblasts from WS patients exhibit loss of lagging strand telomeres which can be reconstituted with a nuclease-deficient WRN-E84A but not with the helicase-deficient WRN-K577M. This associates WRN helicase function with sustaining lagging strand telomeres [4]. Therefore, it is not surprising that WRN physically interacts with proteins associated with telomeres. Telomere binding protein 2 (TRF2) stimulates WRN and BLM helicase activities [10]. Likewise, the telomeric single-strand DNA-binding protein, POT1 (both variants POT1v1 and POT1v2), stimulates WRN unwinding of telomeric forks and synthetic D-loop substrates [11]. Another protein, replication protein A (RPA), stimulates WRN helicase activity dramatically and this functional stimulation is mediated by the direct acidic repeat and the RecQ C-terminal (RQC) domains of WRN [12,13].

WRN helicase translocates along DNA strands in the 3'→5' direction [14]. A number of studies have shown that WRN can unwind a wide variety of different oligonucleotide-based DNA substrates, including forked duplexes, four-way junctions modeling the Holliday junction, and simple 3'-tailed duplexes in addition to non-B-form DNA structures, such as G-quadruplexes [15]. Furthermore, WRN is a unique protein in the RecQ helicase family because it also possesses 3'→5'-exonuclease activity [16]. WRN has preferential DNA binding activities toward DNA

substrates that possess both single-stranded DNA (ssDNA) and double-stranded DNA (dsDNA) junctions [17]. In addition, the WRN conserved RQC (RecQ C-terminal) domain has been shown to be the strongest DNA binding region with position K1016 mediating important WRN-DNA interaction which inactivates WRN helicase function when mutated [17,18]. The preference of WRN for these particular DNA substrates directly translate to preferential DNA unwinding activity of WRN toward structure-specific DNA substrates such as bubbles, forks, Holliday junctions, G4 tetraplexes, triple helices, blunt ended or 5'-overhang linear DNA substrate.

Previous studies on the biochemical characterization of WRN helicase suggest that WRN requires at least 8-nucleotide (nt) 3'-ssDNA tail to properly load and initiate unwinding [19]. In addition, WRN must interact with at least a 3-nt 5'-ssDNA tail at the fork junction [19]. Also, bulky adducts such as benzo[a]pyrene 7,8-diol 9,10-epoxide, a cellular metabolite of benzo[a]pyrene produced by UDP-glucuronosyltransferase mediated glucuronidation, inhibits WRN helicase activity only when adducts are present in the translocating DNA strand of WRN [20]. However, the DNA unwinding properties of WRN are poorly understood when in the absence of a 3'-ssDNA tail or in the presence of gaps in the translocating strand. WRN may encounter such gaps frequently *in vivo* because gaps arise during intermediary steps of DNA repair processes. For instance, such gaps are found after dual incisions mediated by ERCC1-XPF during nucleotide excision repair and interstrand cross-link repair, also during mismatch repair downstream of EXO1 catalyzed removal of nucleotides, and subsequent steps following APE1-catalyzed DNA backbone cleavage in BER [21–24]. Thus, we hypothesized that gaps present in the translocating DNA strand would pose an obstacle for WRN helicase progression. Furthermore, WRN interacts physically and functionally with many DNA binding proteins involved in DNA repair processes. If present at DNA gaps, these proteins would bind to the exposed ssDNA or dsDNA in the vicinity of the gap and could modulate the catalytic function of WRN. For example, single strand binding proteins such as replication protein A (RPA) coat the 5'-overhang and recruit interacting proteins, among which WRN could be recruited, thereby modulating the WRN helicase activity. In addition, DNA damages in human telomeres consisting of 5–15 kb of TTAGGG tandem repeats could give rise to gaps. The telomeric DNA is highly susceptible to DNA damage from oxidative stress or alkylating agents suggesting that DNA repair processes occur in order to maintain genomic stability in telomeric DNA [25]. Since WRN functionally interacts with telomeric DNA binding proteins such as telomere repeat binding factor 2 (TRF2), or protector of telomeres 1 (POT1), we investigated whether they could facilitate WRN unwinding across the gap by acting as a bridge or a recruitment factor in the absence of a 3'-ssDNA tail for loading.

## Methods

### Recombinant proteins

Recombinant His<sub>6</sub>-tagged WRN protein (WRN and WRN-E84A) was over-expressed in SF9 insect cells after transfection with WRN-E84A baculovirus or WRN baculovirus. WRN and WRN-E84A protein was purified as previously described [26]. WRN-HR was cloned into a Gateway BaculoDirect Baculovirus Expression System (Invitrogen) according to the manufacturer's guidelines and the recombinant N-terminal His<sub>6</sub>-tagged proteins were purified using Nickel-desalting-gel filtration columns attached to AKTA Express FPLC (Amersham). Recombinant N-terminal His<sub>6</sub>-tagged TRF2 was prepared as described previously [10].

Recombinant POT1v2 was a gift from Dr. Thomas R. Cech (University of Colorado). Recombinant human RPA was provided by Dr. Mark Kenny (Albert Einstein Cancer Center, New York). Recombinant *E. coli* UvrD was purchased from BioHelix and stored in 20 mM Tris pH 8.3, 200 mM NaCl, 50% glycerol, 1 mM disodium EDTA, 25 mM 2-ME.

### DNA substrate preparation

The 34 bp duplex DNA fork substrate with 3' and 5'-single stranded T<sub>15</sub> overhangs were prepared as described previously [27]. The gap substrates were prepared by annealing 5'-<sup>32</sup>P-radiolabeled strand oligomer (as indicated in the figures) to two other strand oligomers by adding 3 to 4- fold excess unlabeled strand oligomer. Table 1 shows sequences of top and two bottom oligomers that were used to generate a specific DNA substrate containing a gap. For the annealing reaction, radiolabeled oligomer was incubated with other two oligomers at 95°C for 5 min. The reaction mixture was allowed to cool down to room temperature over next 3 h.

### Helicase assay

The reaction conditions for helicase assays were performed as described previously [28]. 10 μl reactions contained 30 mM HEPES (pH 7.4), 5% glycerol, 40 mM KCl, 100 ng/μl BSA, 0.8 nM DNA substrate, 2 mM MgCl<sub>2</sub> and 2 mM ATP. Reactions were incubated for 15 min at 37°C and terminated using 5 μl stop buffer (0.05 M EDTA, 40% glycerol, 1% SDS, 0.05% bromophenol blue, and 0.05% xylene cyanol FF). A cold trap oligomer (100-fold) complementary to the unlabeled, unwound oligomer was added at the end of the enzymatic reaction. Reaction mixtures were electrophoresed in non-denaturing 12% polyacrylamide gels in 1× TAE or TBE buffer and the results were analyzed using Molecular Dynamics phosphorimager (ImageQuant software) or Scion image.

## Results

### The WRN helicase efficiently unwinds past 2 nucleotide gaps in the translocating DNA strand

The WRN helicase possesses a unique property for DNA binding to junctions containing both ssDNA and dsDNAs [17]. It requires at least 3 nt 5'-ssDNA and 8 nt 3'-ssDNA tails at the fork junction for optimal helicase activity [19]. Previously, WRN has been shown to unwind 1-nt gapped substrate with moderate efficiency even in the presence of 3'-internal mismatches [29]. However, this interesting observation was not characterized further. In order to investigate WRN gap-unwinding activity mechanistically, we designed forked substrates with increasing gap-size in the translocating DNA strand.

We used a long-forked substrate as a control for WRN helicase activity as described previously and modified the substrate generating gaps of different sizes on the translocating strand. The gaps are 1-, 2-, and 3-nt, located 15 bp from the fork, and consequently resulting in different size downstream duplex (Fig. 1B-b). We then performed helicase assays using recombinant WRN proteins and the DNA substrates. Figures 2A–2D show representative helicase assays with WRN and gap DNA substrates and substrates without gaps. The unwinding of gapped substrates increased in a WRN concentration-dependent manner as shown in Figure 2A–2D. At a 6 nM concentration of the WRN protein, quantifications of these assays revealed that WRN could unwind ~40% of the 1-nt gap substrate (the mean of three different experiments), ~17% of the 2-nt gap substrate (the mean of three different experiments), and ~15% of the 3-nt gap substrate (the

**Table 1.** Sequences of oligomers used for the making of DNA substrates.

|                |         |                                                                                |
|----------------|---------|--------------------------------------------------------------------------------|
| 1nt-Gap        | Top     | 5'-TTTTTTTTTTTTTTTTTCGATTACGCGTTACGCGTACGCGCATG CACTAC-3'                      |
|                | Bottom1 | 5'-CGTAACGCGTAATCGTTTTTTTTTTTTTTT-3'                                           |
|                | Bottom2 | 5'-GTAGTGCATGCGCGTAAAC-3'                                                      |
| 2nt-Gap        | Top     | Same as for 1ntGap Top                                                         |
|                | Bottom1 | Same as for 1ntGap Bottom1                                                     |
|                | Bottom2 | 5'-GTAGTGCATGCGCGTAA-3'                                                        |
| 3nt-Gap        | Top     | Same as for 1ntGap Top                                                         |
|                | Bottom1 | Same as for 1ntGap Bottom1                                                     |
|                | Bottom2 | 5'-GTAGTGCATGCGCGTA-3'                                                         |
| No-gap         | Top     | 5'-TTTTTTTTTTTTTTTTTCGATTACGCGTTACGCGTACGCGCATG CACTAC-3'                      |
|                | Bottom  | 5'-GTAGTGCATGCGCGTAAACG CGTAACGCGTAATCGTTTTTTTTTTTTTTT-3'                      |
| TRF2 substrate | Top     | 5'-TTTTTTTTTTCCTTATTACGCGTTACGCGTTAGGGTTAGGG TTAGGGTTAGGG-3'                   |
|                | Bottom1 | 5'-TTTTTTTTTTTGAATAATGCGCAATGC-3'                                              |
|                | Bottom2 | 5'-AATCCCAATCCCAATCCCAATCCC-3'                                                 |
| POT1 substrate | Top     | 5'-TTTTTTTTTTCCTTATTACGCGTTATTAGGGTTAGGGTTAGG GTTAGGGTTAGGGCGCGCATGCACTACGG-3' |
|                | Bottom1 | 5'-TTTTTTTTTTTGAATAATGCGCAAT-3'                                                |
|                | Bottom2 | 5'-GCGCGTACGTGATGCC-3'                                                         |

doi:10.1371/journal.pone.0004673.t001

average of two different experiments) (Fig. 2E). In the absence of ATP, no unwinding of the 1-nt gap substrate was observed (data not shown). The less efficient unwinding of the 2-nt gap or 3-nt gap compared to no gap suggested that WRN could not tolerate a

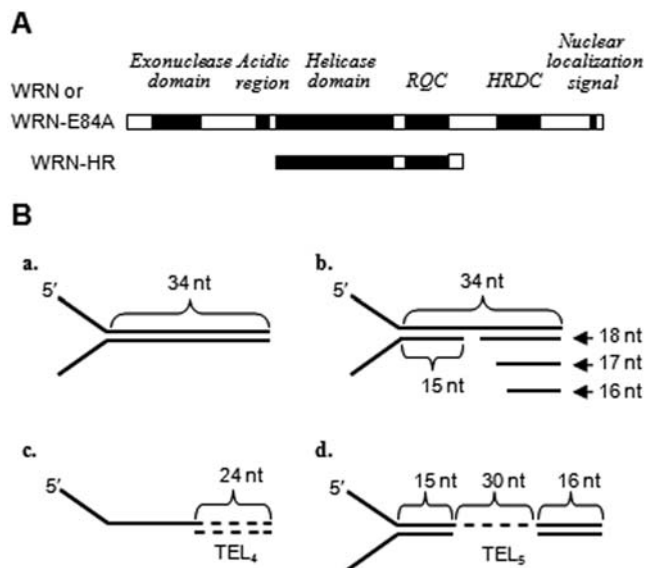

**Figure 1. A schematic diagram of recombinant proteins and DNA substrates.** (A) The modulations of active helicases were studied using WRN variants. WRN-E84A is a full-length WRN with the N-terminal exonuclease inactivating mutation at E84 to alanine. WRN-HR is a WRN fragment containing helicase and RQC domains. (B) All DNA substrates contained 5'-10-nt poly-T tails while 3'-10-nt poly-T tails were excluded only in few of the indicated experiments. [a] Fork substrate without gap. [b] Fork substrate with 1 to 3-nt gap. [c] Fork substrate with 4 telomeric repeats located in the duplex DNA following 3-nt gap. [d] Fork substrate with 5 telomeric repeats located in ssDNA of the non-translocating strand.

doi:10.1371/journal.pone.0004673.g001

gap up to 2-nt in the translocating DNA strand. Interestingly, much higher unwinding efficiency of WRN on the 1-nt gap substrate than on the substrate with no gaps suggested that WRN helicase is able to recognize and translocate over a 1-nt gap.

To determine which regions of WRN are responsible for the unwinding of gapped substrates, we performed helicase assays using the WRN-HR protein fragment that spans from amino acid (aa) 500 to 1092 of WRN, containing both helicase and RQC domains (termed as HR, Fig. 1A). Previous results demonstrated that the unwinding activity of WRN-HR was similar to that of the full-length WRN using DNA substrates that are shorter than 50-nt long without gaps [30]. Thus, we hypothesized that WRN-HR also would be as efficient in unwinding 1-nt gap substrates as the full-length WRN. However, we observed no unwinding of the 1- to 3-nt gap substrates with WRN-HR, suggesting that other DNA binding domains apparently play critical roles in unwinding gapped substrates (Fig. 3). Radiometric helicase assays were then performed using *E. coli* DNA helicase, UvrD, which has been implicated in mismatch and nucleotide excision repair (NER) pathways [31,32]. UvrD can initiate DNA unwinding at nicks in DNA without requiring other accessory proteins [33], suggesting that it has the potential to unwind gapped substrates. However, UvrD was very poor at unwinding 1- to 3-nt gapped substrates as shown in Figure 4A and 4B. Quantifications of the unwound product from at least two independent experiments showed less than 12% unwinding of 1-nt gap substrate compared to ~50% unwinding by WRN (comparison of Fig. 4C to Fig. 2E). This suggests that WRN possesses a unique ability to efficiently translocate over a 1-nt gap in the translocating strand.

#### RPA can recruit WRN to DNA and stimulate it to initiate unwinding in the absence of a 3'-ssDNA tail normally required for loading

WRN exhibits progressive decrease in its ability to unwind gapped substrates with increasing gap size. Thus, we hypothesized that a prominent WRN-interacting protein may act as an accessory protein to facilitate unwinding over a gap bigger than

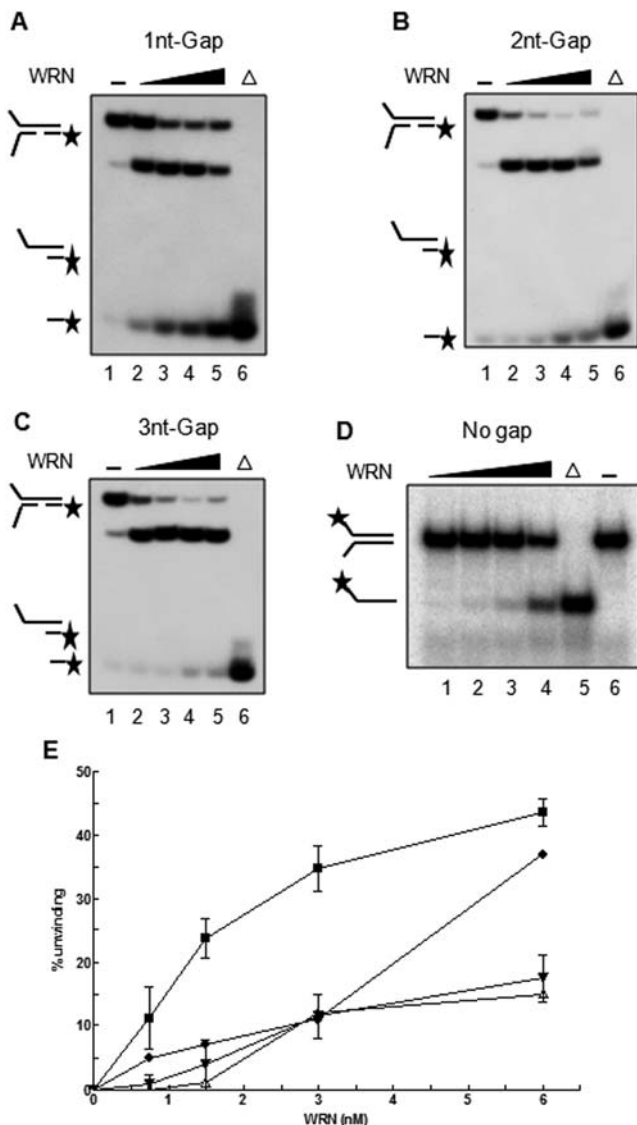

**Figure 2. Radiometric DNA helicase assay using gap substrates and WRN.** Each assay was performed using 1.5 nM of each substrate and a range of WRN concentration from 0.75 to 6 nM. A cold trap oligomer complementary to the unlabeled, unwound oligomer (100-fold) was added at the end of the enzymatic reaction. (A) A representative gel picture of the assay using 1-nt gap. The arrows indicate the migration pattern of the unwound product (radiolabeled ss oligomer). (B) A representative gel picture of the assay using 2-nt gap substrate. (C) A representative gel picture of the assay using 3-nt gap substrate. (D) A representative gel picture of the assay using DNA substrate without a gap. (E) Quantifications of at least three or two independent experiments shown in A and B. The graph is plotted as the percentage of unwound product on the Y-axis and the concentration of WRN on the X-axis. The mean values of three different experiments were plotted with standard deviation indicated by error bars (1-nt gap substrate and 2-nt gap substrate). Filled-circles indicate DNA substrate without a gap. Likewise, filled-squares indicate 1-nt gap substrate, filled-inverse triangles indicate 2-nt gap substrate and open triangles, 3-nt gap substrate. Asterisk indicates a 5'-<sup>32</sup>P labeled strand. Δ indicates boiled substrate. doi:10.1371/journal.pone.0004673.g002

3-nt in length. Such longer gaps might arise during LP-BER, and replication protein A (RPA) is a known processivity factor for WRN helicase involved in this process. A helicase assay on 3-nt

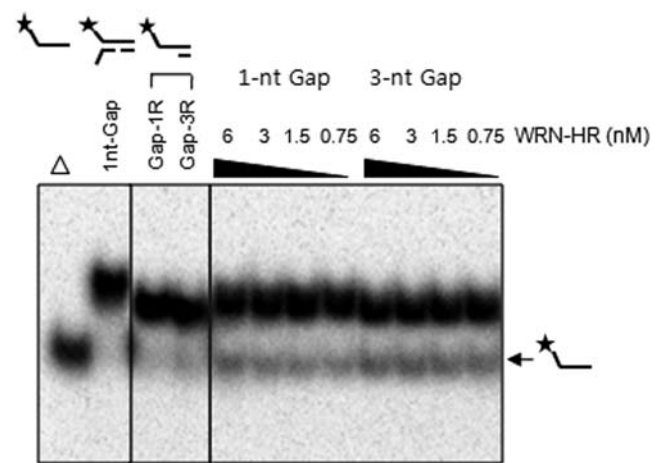

**Figure 3. Radiometric DNA helicase assay using gap substrates and WRN-HR.** Lanes 1–4 are control samples without WRN-HR. Lanes 5–8 contain decreasing concentration of WRN-HR from 6 nM to 0.75 nM using 1-nt gap substrate. Likewise, lanes 9–12 contain the same range of WRN-HR concentration using 3-nt gap substrate. Asterisk indicates a 5'-<sup>32</sup>P labeled strand. Δ indicates boiled substrate. doi:10.1371/journal.pone.0004673.g003

gap substrates was carried out in the presence of WRN and RPA. As shown in Figure 5A, there was a significant stimulation of unwinding past a 3-nt gap in the presence of RPA (compare lane 2 to lane 5). This suggested that WRN helicase could be facilitated to translocate over the 3-nt gap by the WRN-RPA interaction. In order to clarify whether RPA is capable of directly recruiting WRN without the minimum length of a 5-nt 3'-ss tail required by WRN alone [19] to load onto the DNA substrate, we designed a different DNA substrate using four telomeric repeats as shown in Fig. 1B-c except that the substrate lacked a 3'-ss tail (lacking bottom 1 oligomer in TRF2 substrate, Table 1). The result of a helicase assay using this substrate showed a clear unwinding of the duplex DNA region in the presence of RPA (Fig. 5B, lane 5 compared to lanes 2 and 6), but its extent is slight. WRN unwinding was 22% for wild-type WRN at the highest RPA concentration used in lane 5 (Fig 5B).

### POT1v1 can help WRN unwind past the gap through protein-protein interaction

Recently, WRN was determined to be a functional partner of protection of telomeres 1 (POT1) protein, which is a part of the shelterin complex [11,34]. POT1 appears to play an integral role in capping the single-stranded telomere ends [35]. POT1v2 is a C-terminal truncated form of POT1v1, and both v1 and v2 have been shown to bind efficiently to single-stranded telomeric DNA through the N-terminal oligonucleotide/oligosaccharide binding (OB) folds [35]. The minimum length requirement for the DNA binding of POT1 has been determined to be a 10-nt with a sequence of “TTAGGGTTAG” from the X-ray co-crystal structure of POT1v2 and ssDNA [11]. Since POT1 binds to single-stranded DNA, POT 1 functions somewhat like RPA, but is telomere specific, thus comparing POT1:WRN to RPA:WRN will interrogate whether the reaction is telomere specific.

Based on our results that WRN was very inefficient at unwinding past a 3-nt gap (Fig. 2C), we questioned whether POT1, which binds to 10-nt telomeric ssDNA (or longer), could help WRN unwind a bigger gap in the translocating strand. Thus, we designed the DNA substrate shown in Figure 1B-d which harbors 5 telomeric ssDNA repeat regions allowing sufficient room for POT1v1 to bind. We pre-bound POT1 on this substrate and

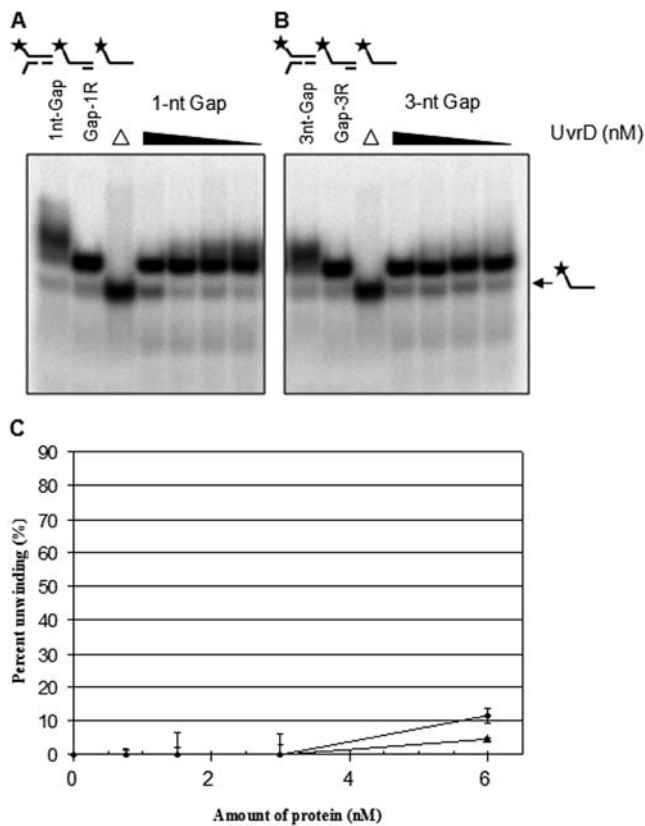

**Figure 4. Radiometric DNA helicase assay using gap substrates and UvrD.** The equal molar concentration range of UvrD was used from 0.75, 1.5, 3 to 6 nM. The arrows indicate the migration pattern of the unwound product (radiolabeled ss oligomer). (A) A representative gel picture of the assay using 1-nt gap. (B) A representative gel picture of the assay using 3-nt gap substrate. (C) Quantifications of at least two or more independent experiments shown in A and B. The graph is plotted as the percentage of unwound product on the Y-axis and the concentration of WRN on the X-axis. The mean values of replicate experiments were plotted with standard deviation indicated by *error bars*. Likewise, filled-diamond indicate 1-nt gap substrate, filled-triangle indicate 3-nt gap substrate. Asterisk indicates a 5'-<sup>32</sup>P labeled strand. Δ indicates boiled substrate. doi:10.1371/journal.pone.0004673.g004

asked whether POT1v1 could facilitate WRN in unwinding past the 30-nt gap. Figure 6A shows a representative gel picture of at least two independent radiometric helicase assays for which the reactions were initiated by adding WRN-E84A to DNA substrates pre-bound with POT1v1. Interestingly, POT1v1 exhibited mild yet distinct stimulation of WRN-E84A to unwind past the gap in a concentration-dependent manner. The quantification of unwound product as a result of POT1v1 stimulation shows that at the 1:8 ratio of WRN-E84A to POT1v1, we observed ~10% increase in the unwound product (Fig. 6C). Furthermore, when we used the same assay with a modified DNA substrate lacking a 3'-ss tail, we did not observe any increase in the unwound product suggesting that POT1 stimulates WRN-E84A through a mechanism different from direct recruitment of WRN by RPA (data not shown). The protein-protein interaction between WRN and POT1 was previously determined to be mediated by the N-terminal of POT1 while the C-terminal was dispensable for the WRN-POT1 interaction [11]. Thus, we also tested unwinding with POT1v2, which has similar DNA binding activity and WRN helicase-stimulating activities as POT1v1. The results from Figure 6B show

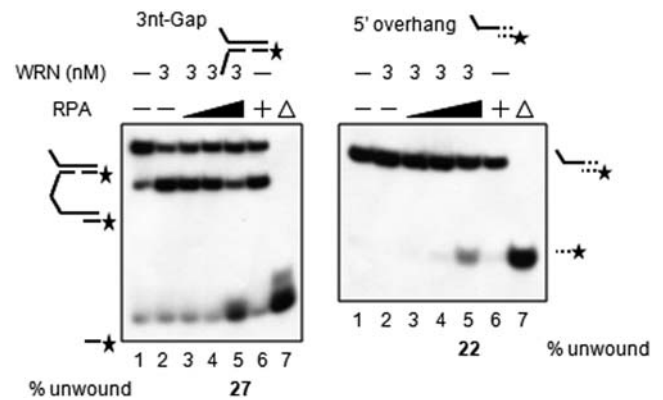

**Figure 5. Radiometric DNA helicase assay using gap substrates with WRN in the presence of RPA.** (A) Lanes 3–5 contained WRN (3 nM) and a range of RPA (6 nM, 12 nM, and 24 nM) concentrations with 3-nt gap substrates. Lane 2 contained only WRN (3 nM) and lane 6 contained only RPA (24 nM). Lane 1 contained control DNA substrates without any proteins and the substrates were boiled (lane 7). (B) The reaction mixtures contained DNA substrate as indicated in the upper right hand corner of the figure which is exactly the same substrate shown in Figure 1B[c] except for lacking the 3'-ss tail oligo. Lane 1 was a control reaction with only DNA substrate. Lane 7 was a heat-denatured substrate. Lane 2 was a control sample with only WRN. Lane 6 was a control samples with only RPA in the concentration range of 24 nM. Lanes 3–5 were reaction mixtures containing both RPA and WRN. WRN concentration was held constant at 3 nM and the RPA concentration was in the range of 6 nM to 24 nM. At the end of the enzymatic reaction, a cold-trap oligomer complementary to the unlabeled, unwound oligomer was added. The arrows indicate the migration pattern of the unwound product (radiolabeled top strand oligomers). Asterisk indicates a 5'-<sup>32</sup>P labeled strand. Δ indicates boiled substrate. doi:10.1371/journal.pone.0004673.g005

no stimulation of WRN unwinding activities in the presence of POT1v2 using the same gapped substrates.

Next, we tested whether telomere repeat binding factor 2 (TRF2), another subunit of the shelterin complex [36] and a functional partner of WRN, could also stimulate WRN to unwind past the gap like RPA and POT1v1. As shown in Figure 1B, the DNA substrate for TRF2 contained 4 double-stranded telomeric repeats following the 3-nt gap (Fig. 1B-c) in order to accommodate proper pre-binding of TRF2 [10]. Figure 6D shows a representative gel picture of at least 3 independent experiments using the DNA substrate shown in Figure 1B-c. In contrast to the situation for RPA and POT1v1, TRF2 did not facilitate WRN unwinding beyond the gap even at the highest ratio of WRN to TRF2, 1:16.7 (Fig 6D, lane 1). Furthermore, we positioned 4 telomeric repeats in front of the 3-nt gap in order to determine whether different positioning of the TRF2 DNA binding might help WRN unwinding past the gap, but TRF2 failed to aid WRN in this process (data not shown). This suggests that regardless of location of the TRF2 binding site before or after the 3-nt gap TRF2 cannot aid WRN to unwind past the gap.

## Discussion

WRN is proposed to participate in long patch base excision repair (LP-BER) based on the functional interaction with many of the proteins involved in this pathway [37,38]. WRN is implicated in subsequent steps following processing by APE1 because while APE1 remains associated with the nicked DNA product, WRN helicase is inhibited [38]. In addition, WRN has been shown to have poor unwinding activity at a nicked DNA substrate



Previous observations that WRN requires at least a 8-nt 3'-ssDNA tail to initiate DNA unwinding argues against the idea that WRN falls off at the gap and reloads to continue unwinding downstream of the gap [19]. When *E. coli* UvrD helicase, implicated in nucleotide excision repair (NER) and mismatch DNA repair, was tested in the helicase assay using the gapped substrates, we observed almost complete lack of unwinding downstream to the gap, which is strikingly different from the situation for WRN [40]. This suggests a distinct role of WRN in unwinding past the gap and is distinguishable from the involvement with other DNA repair pathways such as NER or mismatch repair.

The mechanism by which WRN unwinds past the gaps involves the N-terminal and C-terminal parts of WRN protein based on our observations using the WRN-HR fragment. This finding is supported by the previous data obtained from our lab comparing full-length WRN protein and WRN-HR helicase activity. They diminished dramatically when the DNA substrate length was increased beyond 50-nt [30]. In support of this notion, the exonuclease and HRDC domains of WRN have been determined previously to possess auxiliary DNA binding activities [17]. Taken together, these data suggest the importance of using full-length WRN or WRN-E84A for mechanistic studies of WRN helicase function.

The WRN-RPA interaction has been studied previously revealing that the protein-protein interaction is mediated by the direct acidic repeats in addition to the RQC domain, and upon this interaction RPA acts as a processivity factor for the WRN helicase [30]. However, it has not previously been observed that RPA can act as a direct recruiting factor for WRN to initiate DNA unwinding without the required 3'-ssDNA tail.

RPA has been also implicated in the LP-BER pathway [41] and the ability of RPA to recruit WRN could be one of the mechanism by which WRN translocates to gaps in the BER intermediates in order to initiate unwinding of the DNA downstream of the lesion.

When the replication fork complex encounters a lesion in the lagging strand, DNA lesions on the lagging strand can lead to uncoupling of the replication complex and the replication complex continues to unwind as leading strand synthesis goes on. The stalling of the replication fork could be recovered by the formation of a so-called chicken foot intermediate, a structure that is analogous to a Holliday junction. RPA bound to the leading strand would recruit WRN to unwind the DNA duplex along the synthesized strand (5'→3'), allowing fork regression. Repriming replication will be then resumed (Fig. 7B).

There has been a great deal of interest in the field in the question of where in the cell WRN's main function lies. In particular, it has been proposed that WRN exerts its main function at the telomere [11,42]). Thus, we compared the function of RPA, which works in the general genome with POT1, which works specifically at the telomere. Both of these proteins facilitated the unwinding of the 3-nt gaps. The similarity between POT1 and RPA functions with respect to WRN suggests the involvement of POT1 and WRN in the context of BER intermediary steps to resolve BER substrates present in telomeres.

## Author Contributions

Conceived and designed the experiments: BA JWL VB. Performed the experiments: BA JWL HJ GB. Analyzed the data: BA JWL VB. Wrote the paper: BA JWL VB.

## References

- Goto M (2000) Werner's syndrome: from clinics to genetics. *Clin Exp Rheumatol* 18: 760–766.
- Salk D, Au K, Hoehn H, Martin GM (1981) Cytogenetics of Werner's syndrome cultured skin fibroblasts: variegated translocation mosaicism. *Cytogenet Cell Genet* 30: 92–107.
- Poot M, Hoehn H, Runger TM, Martin GM (1992) Impaired S-phase transit of Werner syndrome cells expressed in lymphoblastoid cell lines. *Exp Cell Res* 202: 267–273.
- Crabbe L, Verdun RE, Haggblom CI, Karlseder J (2004) Defective telomere lagging strand synthesis in cells lacking WRN helicase activity. *Science* 306: 1951–1953.
- Kyng KJ, May A, Kolvraa S, Bohr VA (2003) Gene expression profiling in Werner syndrome closely resembles that of normal aging. *Proc Natl Acad Sci U S A* 100: 12259–12264.
- Moser MJ, Oshima J, Monnat RJ Jr (1999) WRN mutations in Werner syndrome. *Hum Mutat* 13: 271–279.
- Yu CE, Oshima J, Wijsman EM, Nakura J, Miki T, et al. (1997) Mutations in the consensus helicase domains of the Werner syndrome gene. *Werner's Syndrome Collaborative Group. Am J Hum Genet* 60: 330–341.
- Oshima J, Yu CE, Piusan C, Klein G, Jabkowski J, et al. (1996) Homozygous and compound heterozygous mutations at the Werner syndrome locus. *Hum Mol Genet* 5: 1909–1913.
- Wyllie FS, Jones CJ, Skinner JW, Houghton MF, Wallis C, et al. (2000) Telomerase prevents the accelerated cell ageing of Werner syndrome fibroblasts. *Nat Genet* 24: 16–17.
- Opreško PL, von Kobbe C, Laine JP, Harrigan J, Hickson ID, et al. (2002) Telomere-binding protein TRF2 binds to and stimulates the Werner and Bloom syndrome helicases. *J Biol Chem* 277: 41110–41119.
- Opreško PL, Mason PA, Podell ER, Lei M, Hickson ID, et al. (2005) POT1 stimulates RecQ helicases WRN and BLM to unwind telomeric DNA substrates. *J Biol Chem* 280: 32069–32080.
- Brosh RM Jr, Orren DK, Nehlin JO, Ravn PH, Kenny MK, et al. (1999) Functional and physical interaction between WRN helicase and human replication protein A [In Process Citation]. *J Biol Chem* 274: 18341–18350.
- Brosh RM Jr, Li JL, Kenny MK, Karow JK, Cooper MP, et al. (2000) Replication protein A physically interacts with the Bloom's syndrome protein and stimulates its helicase activity. *J Biol Chem* 275: 23500–23508.
- Gray MD, Shen JC, Kamath-Loeb AS, Blank A, Sopher BL, et al. (1997) The Werner syndrome protein is a DNA helicase. *Nat Genet* 17: 100–103.
- Fry M, Loeb LA (1999) Human werner syndrome DNA helicase unwinds tetrahelical structures of the fragile X syndrome repeat sequence d(CGG)<sub>n</sub> [In Process Citation]. *J Biol Chem* 274: 12797–12802.
- Huang S, Li B, Gray MD, Oshima J, Mian IS, et al. (1998) The premature ageing syndrome protein, WRN, is a 3'→5' exonuclease. *Nat Genet* 20: 114–116.
- von Kobbe C, Thoma NH, Czyzewski BK, Pavletich NP, Bohr VA (2003) Werner syndrome protein contains three structure-specific DNA binding domains. *J Biol Chem* 278: 52997–53006.
- Lee JW, Kusumoto R, Doherty KM, Lin GX, Zeng W, et al. (2005) Modulation of Werner syndrome protein function by a single mutation in the conserved RecQ domain. *J Biol Chem* 280: 39627–39636.
- Brosh RM Jr, Waheed J, Sommers JA (2002) Biochemical characterization of the DNA substrate specificity of Werner syndrome helicase. *J Biol Chem* 277: 23236–23245.
- Choudhary S, Doherty KM, Handy CJ, Sayer JM, Yagi H, et al. (2006) Inhibition of Werner syndrome helicase activity by benzo[a]pyrene diol epoxide adducts can be overcome by replication protein A. *J Biol Chem* 281: 6000–6009.
- Genschel J, Modrich P (2003) Mechanism of 5'-directed excision in human mismatch repair. *Mol Cell* 12: 1077–1086.
- Bessho T, Mu D, Sancar A (1997) Initiation of DNA interstrand cross-link repair in humans: the nucleotide excision repair system makes dual incisions 5' to the cross-linked base and removes a 22- to 28-nucleotide-long damage-free strand. *Mol Cell Biol* 17: 6822–6830.
- Mu D, Park CH, Matsunaga T, Hsu DS, Reardon JT, et al. (1995) Reconstitution of human DNA repair excision nuclease in a highly defined system. *J Biol Chem* 270: 2415–2418.
- Wong D, DeMott MS, Dimple B (2003) Modulation of the 3'→5'-exonuclease activity of humanapurinic endonuclease (Ape1) by its 5'-incised Abasic DNA product. *J Biol Chem* 278: 36242–36249.
- von ZT (2002) Oxidative stress shortens telomeres. *Trends Biochem Sci* 27: 339–344.
- Sharma S, Otterlei M, Sommers JA, Driscoll HC, Dianov GL, et al. (2004) WRN helicase and FEN-1 form a complex upon replication arrest and together process branchmigrating DNA structures associated with the replication fork. *Mol Biol Cell* 15: 734–750.
- Opreško PL, Laine JP, Brosh RM Jr, Seidman MM, Bohr VA (2001) Coordinate action of the helicase and 3' to 5' exonuclease of Werner syndrome protein. *J Biol Chem* 276: 44677–44687.



28. Choudhary S, Sommers JA, Brosh RM Jr (2004) Biochemical and kinetic characterization of the DNA helicase and exonuclease activities of werner syndrome protein. *J Biol Chem* 279: 34603–34613.
29. Harrigan JA, Wilson DM III, Prasad R, Opresko PL, Beck G, et al. (2006) The Werner syndrome protein operates in base excision repair and cooperates with DNA polymerase beta. *Nucleic Acids Res* 34: 745–754.
30. Doherty KM, Sommers JA, Gray MD, Lee JW, von KC, et al. (2005) Physical and functional mapping of the replication protein a interaction domain of the werner and bloom syndrome helicases. *J Biol Chem* 280: 29494–29505.
31. Hoijmakers JH, Bootsma D (1990) Molecular genetics of eukaryotic DNA excision repair. *Cancer Cells* 2: 311–320.
32. Brosh RM Jr, Matson SW (1995) Mutations in motif II of E.coli DNA helicase II render the enzyme nonfunctional in both mismatch repair and excision repair with differential effects on the unwinding reaction. *J Bacteriol* 177: 5612–5621.
33. Runyon GT, Bear DG, Lohman TM (1990) Escherichia coli helicase II (UvrD) protein initiates DNA unwinding at nicks and blunt ends. *Proc Natl Acad Sci U S A* 87: 6383–6387.
34. de Lange T (2005) Shelterin: the protein complex that shapes and safeguards human telomeres. *Genes Dev* 19: 2100–2110.
35. Lei M, Podell ER, Cech TR (2004) Structure of human POT1 bound to telomeric single-stranded DNA provides a model for chromosome end-protection. *Nat Struct Mol Biol* 11: 1223–1229.
36. van OM, de LT (2006) Apollo, an Artemis-Related Nuclease, Interacts with TRF2 and Protects Human Telomeres in S Phase. *Curr Biol*.
37. Harrigan JA, Opresko PL, von Kobbe C, Kedar PS, Prasad R, et al. (2003) The Werner syndrome protein stimulates DNA polymerase beta strand displacement synthesis via its helicase activity. *J Biol Chem* 278: 22686–22695.
38. Ahn B, Harrigan JA, Indig FE, Wilson DM III, Bohr VA (2004) Regulation of WRN Helicase Activity in Human Base Excision Repair. *J Biol Chem* 279: 53465–53474.
39. Mohaghegh P, Karow JK, Brosh JR Jr, Bohr VA, Hickson ID (2001) The Bloom's and Werner's syndrome proteins are DNA structure-specific helicases. *Nucleic Acids Res* 29: 2843–2849.
40. Mechanic LE, Hall MC, Matson SW (1999) Escherichia coli DNA helicase II is active as a monomer. *J Biol Chem* 274: 12488–12498.
41. DeMott MS, Zigman S, Bambara RA (1998) Replication protein A stimulates long patch DNA base excision repair. *J Biol Chem* 273: 27492–27498.
42. Opresko PL, Otterlei M, Graakjaer J, Bruheim P, Dawut L, et al. (2004) The Werner syndrome helicase and exonuclease cooperate to resolve telomeric D loops in a manner regulated by TRF1 and TRF2. *Mol Cell* 14: 763–774.
